# Supplementary material for: Learning smoothing models of copy number profiles using breakpoint annotations
Source: Springer Nature journal article supplement (doi:10.1186/1471-2105-14-164), 2013-05-22

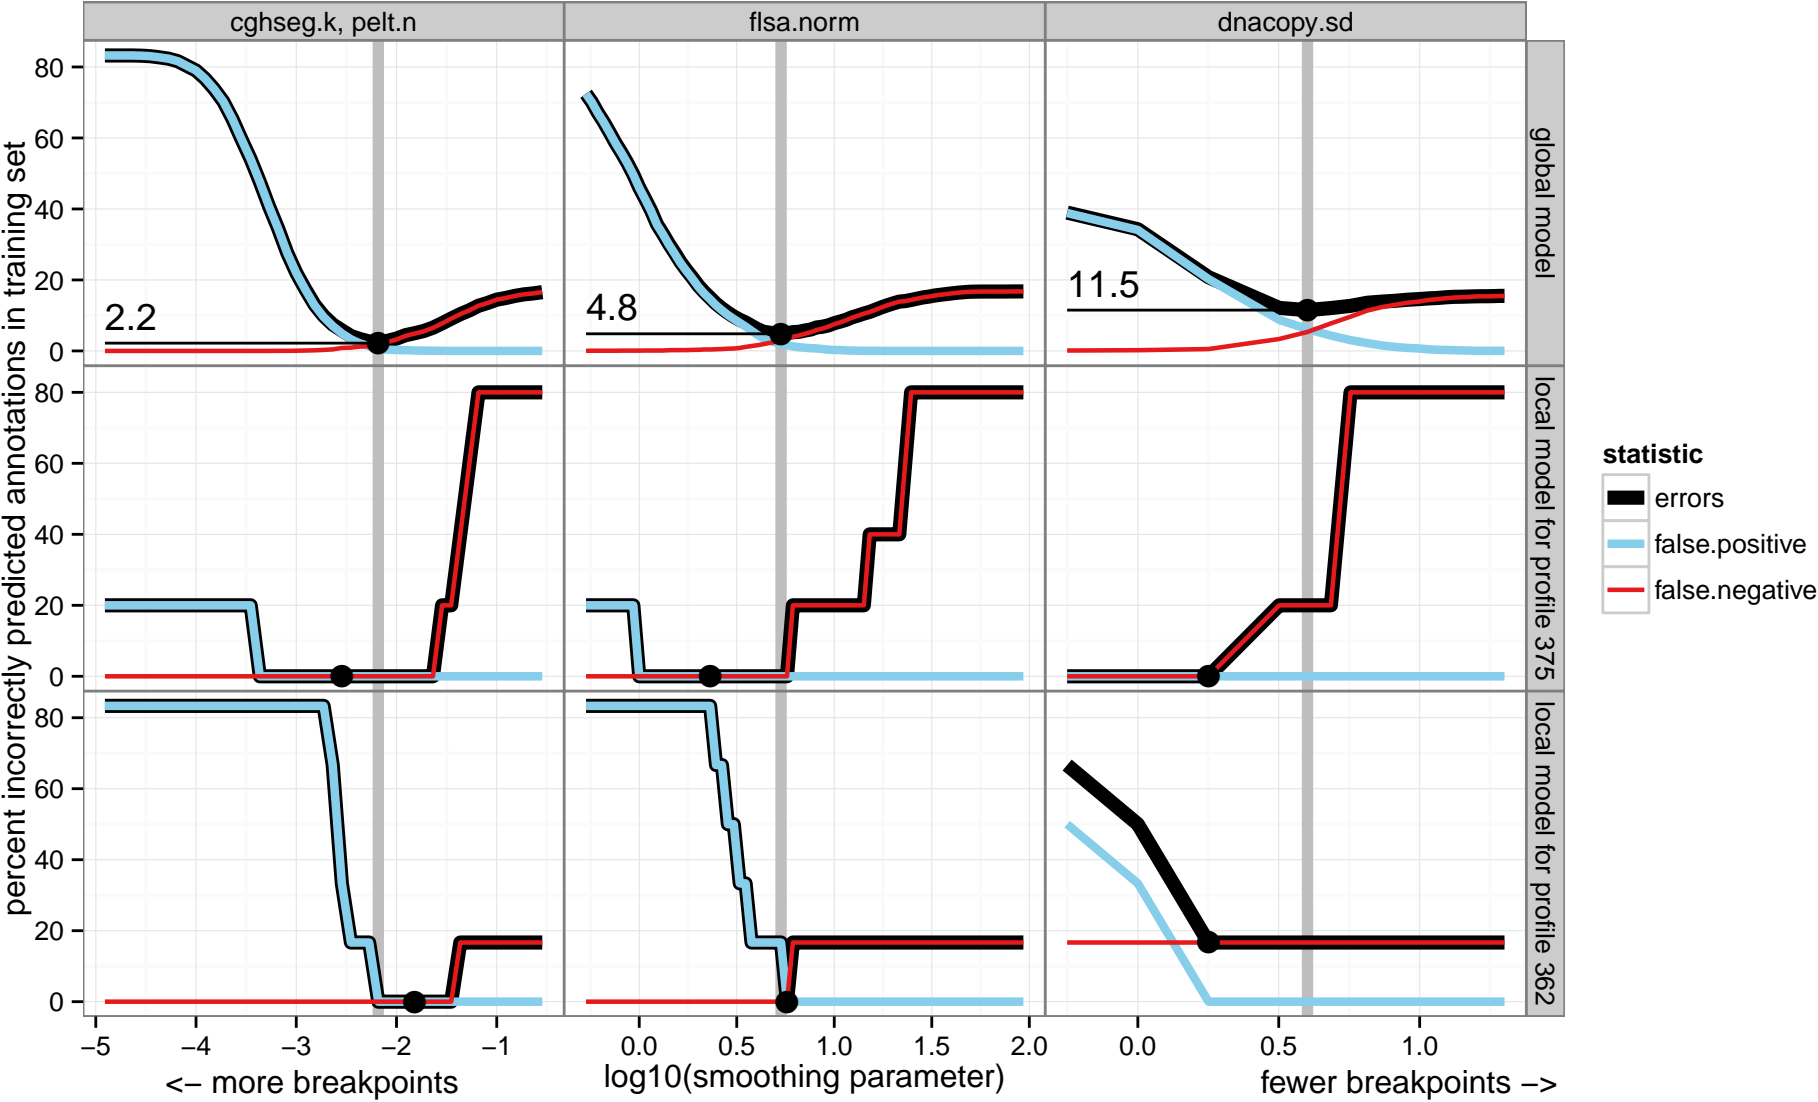

Supplement: 12859_2012_6850_MOESM3_ESM.pdf [file 12859_2012_6850_MOESM3_ESM.pdf]
