# Supplementary material for: Learning smoothing models of copy number profiles using breakpoint annotations
Source: Springer Nature journal article supplement (doi:10.1186/1471-2105-14-164), 2013-05-22
Supplement: 12859_2012_6850_MOESM6_ESM.pdf [file 12859_2012_6850_MOESM6_ESM.pdf]

| algorithm                                                                                           | original |      |      | detailed |      |      |
|-----------------------------------------------------------------------------------------------------|----------|------|------|----------|------|------|
|                                                                                                     | error    | FP   | FN   | error    | FP   | FN   |
| pelt.n             | 0.3      | 0.7  | 0.2  | 2.1      | 5.3  | 1.0  |
| cghseg.k           | 0.3      | 0.7  | 0.2  | 2.3      | 5.6  | 1.1  |
| gada               | 0.6      | 1.6  | 0.5  | 2.5      | 6.3  | 1.2  |
| dnacopy.sd         | 2.5      | 7.5  | 1.5  | 5.1      | 14.1 | 2.2  |
| glad.lambdabreak   | 6.4      | 2.1  | 7.3  | 8.0      | 7.1  | 7.2  |
| flsa.norm          | 1.2      | 3.0  | 0.8  | 8.7      | 19.5 | 4.9  |
| flsa               | 1.3      | 1.4  | 1.3  | 8.9      | 20.6 | 4.9  |
| glad.haarseg       | 9.0      | 1.6  | 10.5 | 9.5      | 6.0  | 9.0  |
| pelt.default                                                                                        | 8.0      | 42.2 | 1.1  | 13.9     | 59.0 | 1.0  |
| dnacopy.alpha      | 17.9     | 1.4  | 21.2 | 16.8     | 7.2  | 16.9 |
| glad.MinBkpWeight  | 19.7     | 0.7  | 23.6 | 18.4     | 4.6  | 19.4 |
| dnacopy.prune      | 25.9     | 2.8  | 30.5 | 23.6     | 8.9  | 24.1 |
| glad.default                                                                                        | 27.4     | 1.6  | 32.7 | 26.0     | 5.0  | 27.7 |
| dnacopy.default                                                                                     | 40.5     | 0.7  | 48.5 | 38.0     | 4.8  | 41.1 |
| cghseg.mBIC                                                                                         | 41.0     | 0.0  | 49.2 | 38.5     | 2.0  | 42.3 |
| gada.default                                                                                        | 80.7     | 0.0  | 96.9 | 82.7     | 0.1  | 92.1 |
| cghFLasso                                                                                           | 80.9     | 0.0  | 97.2 | 83.8     | 0.8  | 93.1 |
