# Supplementary material for: Learning smoothing models of copy number profiles using breakpoint annotations
Source: Springer Nature journal article supplement (doi:10.1186/1471-2105-14-164), 2013-05-22
Supplement: 12859_2012_6850_MOESM10_ESM.pdf [file 12859_2012_6850_MOESM10_ESM.pdf]

|  | algorithm         | error | sd  | fn   | sd   | fp   | sd  | Timings |
|--|-------------------|-------|-----|------|------|------|-----|---------|
|  | pelt.n            | 7.7   | 1.8 | 17.9 | 9.8  | 4.1  | 3.4 | 9.49    |
|  | cghseg.k          | 7.8   | 1.8 | 17.8 | 9.7  | 4.3  | 3.2 | 2.79    |
|  | gada              | 9.5   | 1.5 | 28.2 | 12.6 | 3.6  | 2.8 | 7.54    |
|  | glad.haarseg      | 13.2  | 1.4 | 12.2 | 1.2  | 11.7 | 1.8 | 32.62   |
|  | pelt.default      | 13.9  | 0.1 | 59.0 | 0.3  | 1.0  | 0.0 | 0.08    |
|  | flsa.norm         | 14.6  | 1.3 | 39.3 | 13.1 | 6.5  | 3.6 | 0.12    |
|  | dnacopy.sd        | 15.8  | 2.9 | 42.8 | 24.2 | 7.1  | 5.6 | 61.90   |
|  | glad.lambdabreak  | 17.4  | 1.9 | 25.4 | 15.9 | 13.1 | 4.4 | 17.02   |
|  | dnacopy.alpha     | 17.8  | 0.8 | 8.1  | 0.2  | 17.8 | 0.9 | 29.38   |
|  | flsa              | 20.1  | 1.2 | 56.2 | 25.6 | 8.5  | 5.8 | 0.06    |
|  | glad.MinBkpWeight | 25.5  | 1.0 | 7.8  | 3.0  | 26.5 | 1.4 | 42.39   |
|  | glad.default      | 26.0  | 0.1 | 5.0  | 0.2  | 27.7 | 0.1 | 1.34    |
|  | dnacopy.prune     | 26.7  | 1.0 | 19.5 | 4.8  | 24.9 | 2.0 | 41.34   |
|  | dnacopy.default   | 38.0  | 0.2 | 4.8  | 0.1  | 41.1 | 0.2 | 2.02    |
|  | cghseg.mBIC       | 38.5  | 0.1 | 2.0  | 0.1  | 42.3 | 0.1 | 1.81    |
|  | gada.default      | 82.7  | 0.1 | 0.1  | 0.0  | 92.1 | 0.1 | 0.20    |
|  | cghFLasso         | 83.8  | 0.1 | 0.8  | 0.1  | 93.1 | 0.1 | 0.18    |
